# Supplementary material
Source: publisher site journal article supplement (https://www.dovepress.com/article/463043)

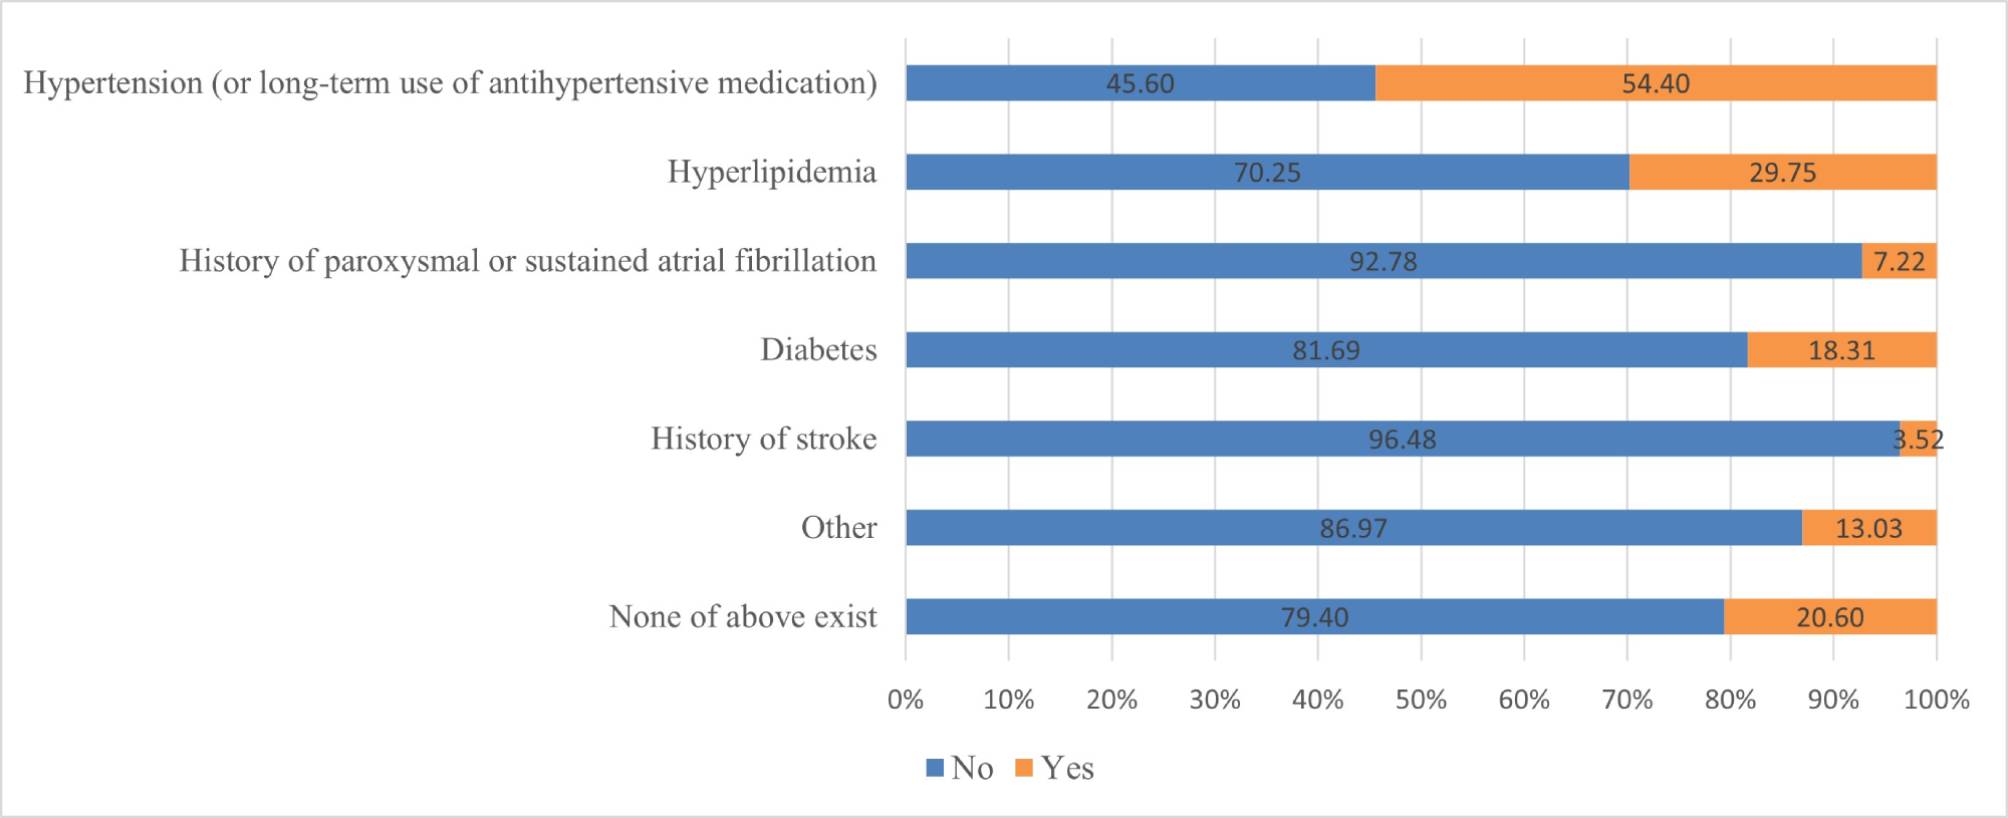


**Figure S1.** Comorbidity among participants

Supplement: Supplementary file 1 [file get_supplementary_file.php]
